# Supplementary material for: Modelling the effects of E / Z photoisomerization of a cyclocurcumin analogue on the properties of cellular lipid membranes
Source: Royal Society of Chemistry journal article supplement (doi:10.1039/d3cp02955g), 2023-01-01
Supplement: d3cp02955g2.pdf [file d3cp02955g2.pdf]

## Supplementary information for

# Modelling the effects of E/Z photoisomerization of a cyclocurcumin analogue on the properties of cellular lipid membranes

Anastasiia Delova,<sup>a</sup> Raul Losantos,<sup>a,b</sup> Jérémy Pecourneau,<sup>c</sup> Maxime Mourer,<sup>c</sup> Andreea Pasc,<sup>c</sup> and Antonio Monari.<sup>a,\*</sup>

<sup>a</sup>Université Paris Cité and CNRS, ITODYS, F-75006 Paris, France.

<sup>b</sup>Universidad de La Rioja, Departamento de Química, Centro de Investigación en Síntesis Química, 26006 Logroño, Spain

<sup>c</sup>Université de Lorraine CNRS, L2CM UMR 7053, F-54000 Nancy, France.

Correspondence: [Antonio.monari@u-paris.fr](mailto:Antonio.monari@u-paris.fr)

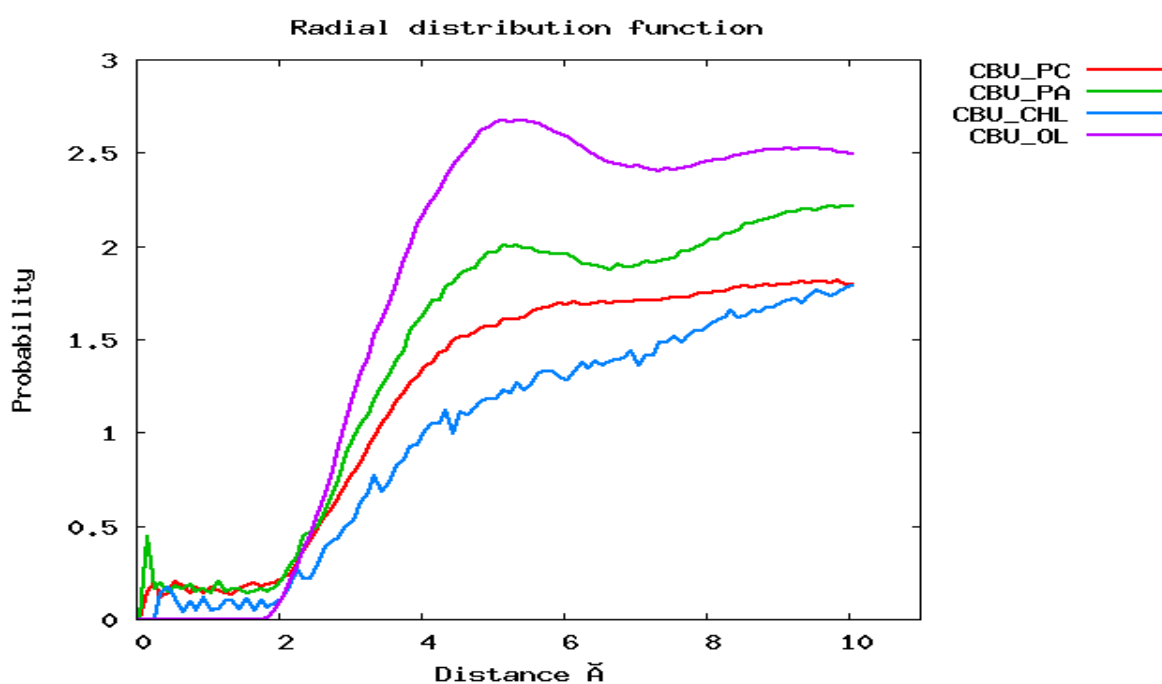

Figure S1. Radial distribution function between CCBu and different lipid moieties: PC are polar heads of DPPC and DOPC; PA is a hydrophobic part of DPPC lipid; OL is a hydrophobic chain of DOPC lipid; CHL is cholesterol.

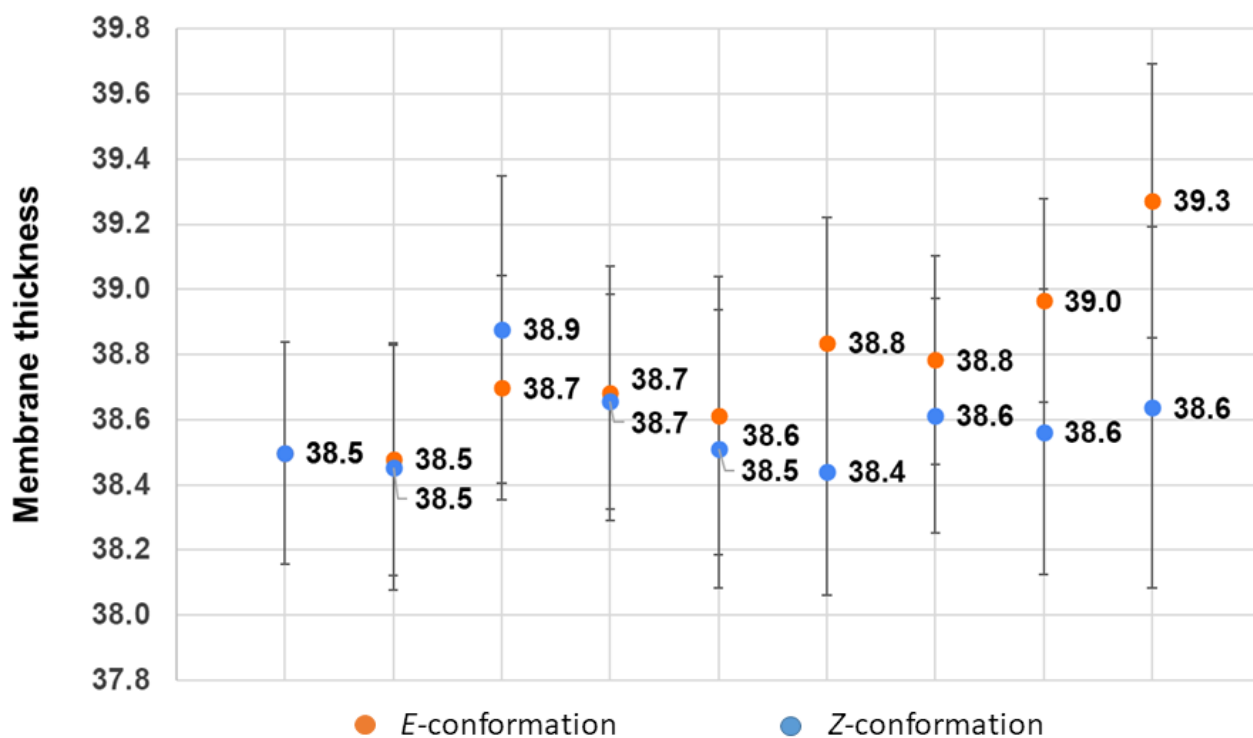

Figure S2. Average and standard deviation of the thickness in Å of the membrane composed of DPPC, DOPC and cholesterol.

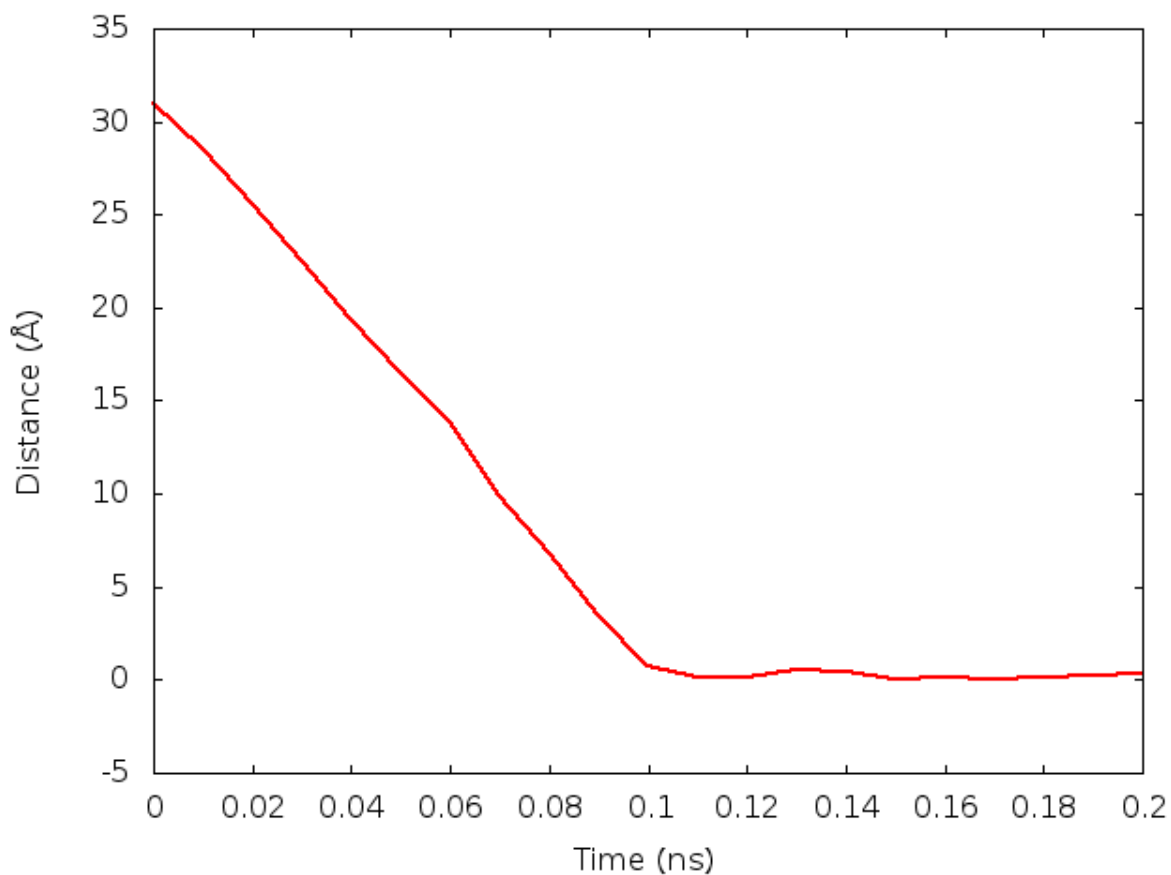

Figure S3. Evolution of the distance between 5 CCBu in E-conformation during the steered molecular dynamics.

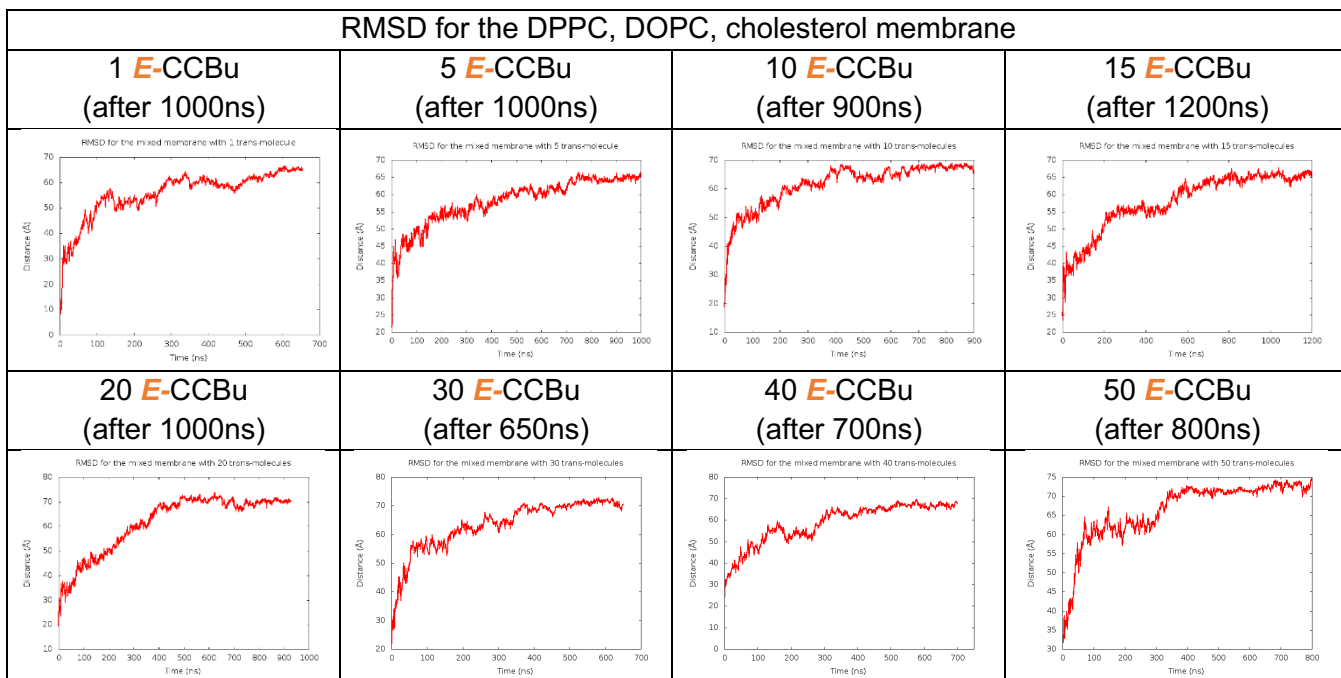

Figure S4. Time evolution of the RMSD for DPPC, DOPC and cholesterol for all constructed systems with different numbers of CCBu in E-conformation.

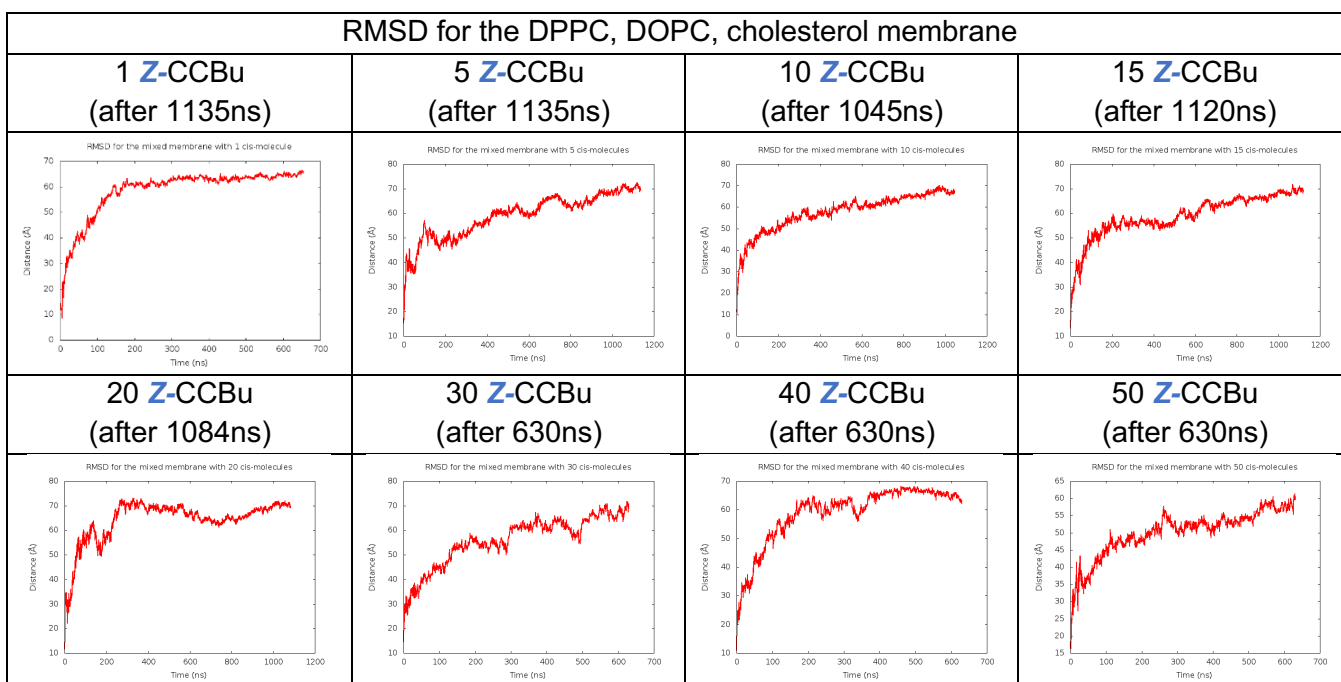

Figure S5. Time evolution of the RMSD for DPPC, DOPC and cholesterol for all constructed systems with different numbers of CCBu in Z-conformation.

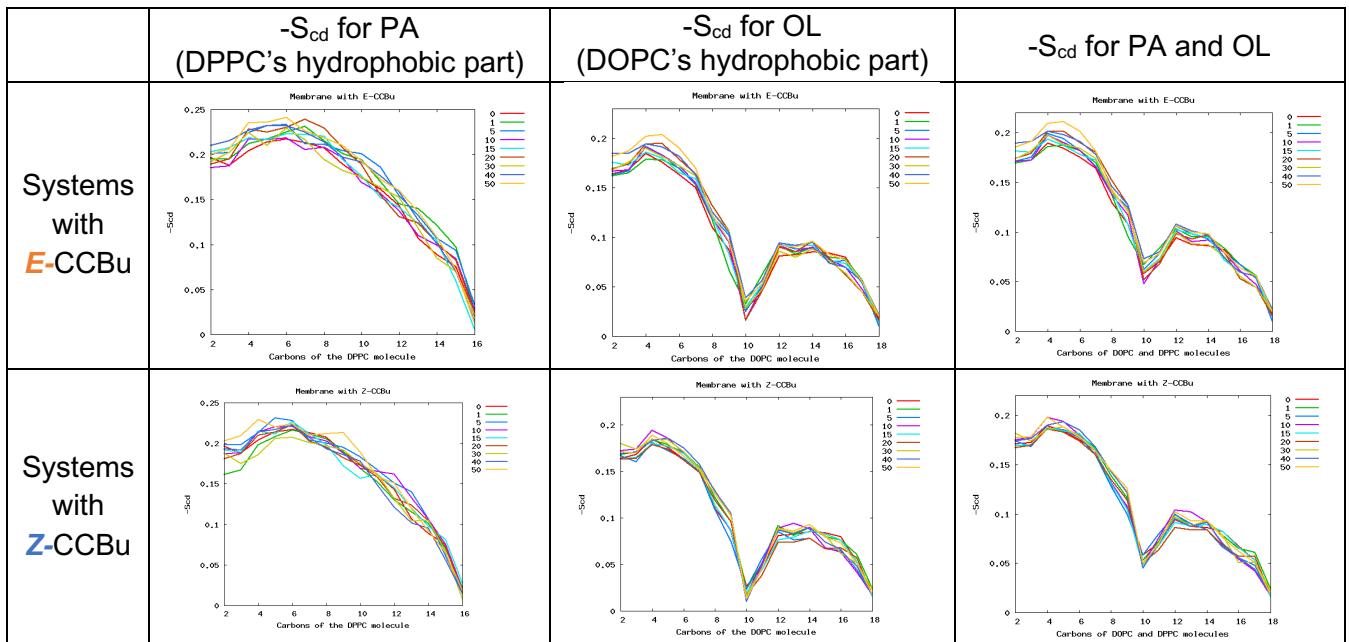

Figure S6. Deuterium order parameter ( $-S_{cd}$ ) for PA (DPPC's hydrophobic tail), OL (DOPC's hydrophobic tail) and both of them for all constructed systems with different numbers of CCBu molecules in E- and Z-conformations.

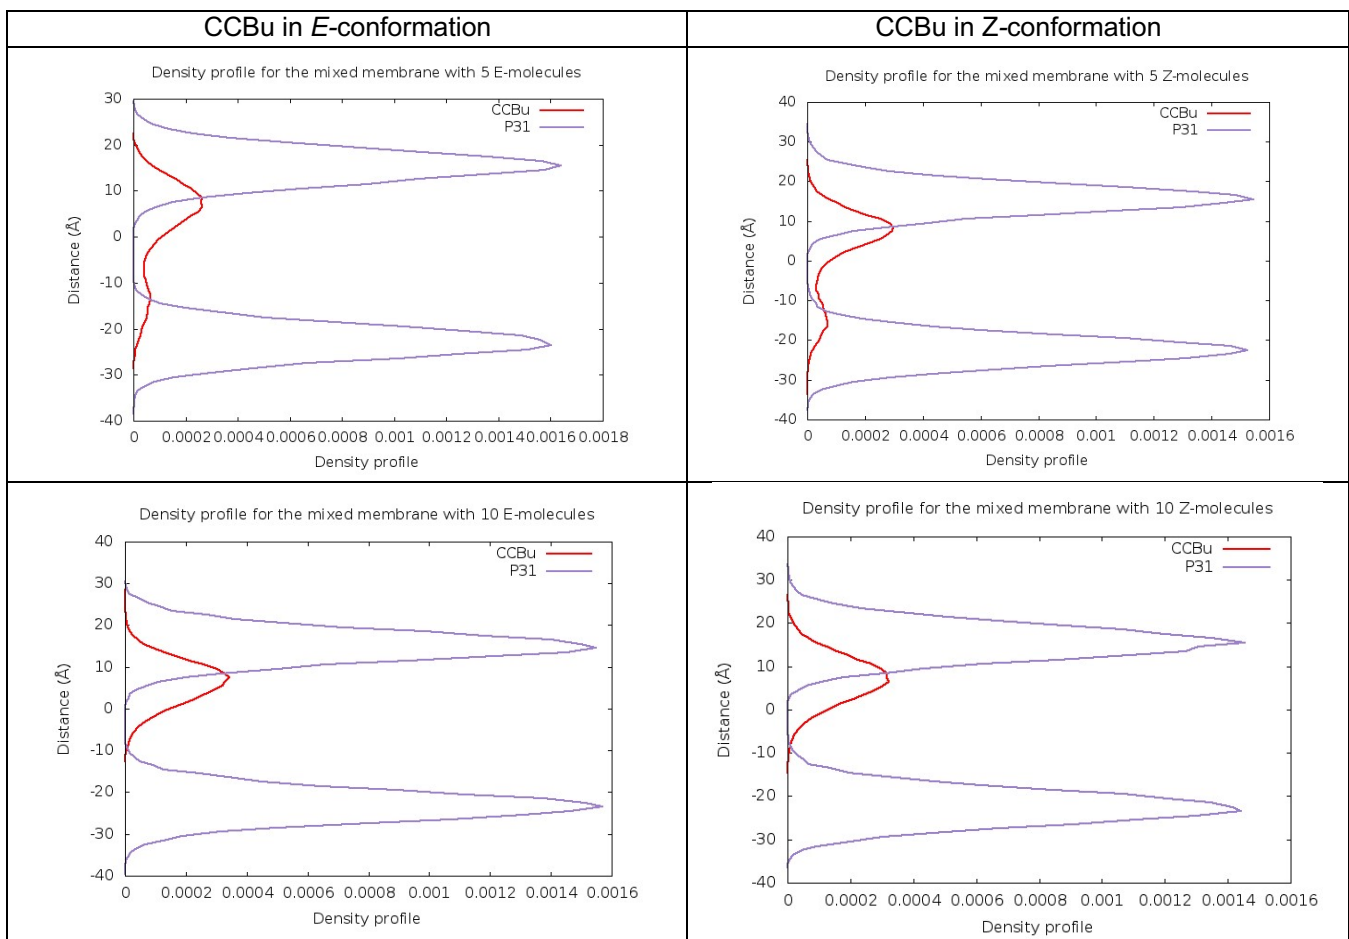

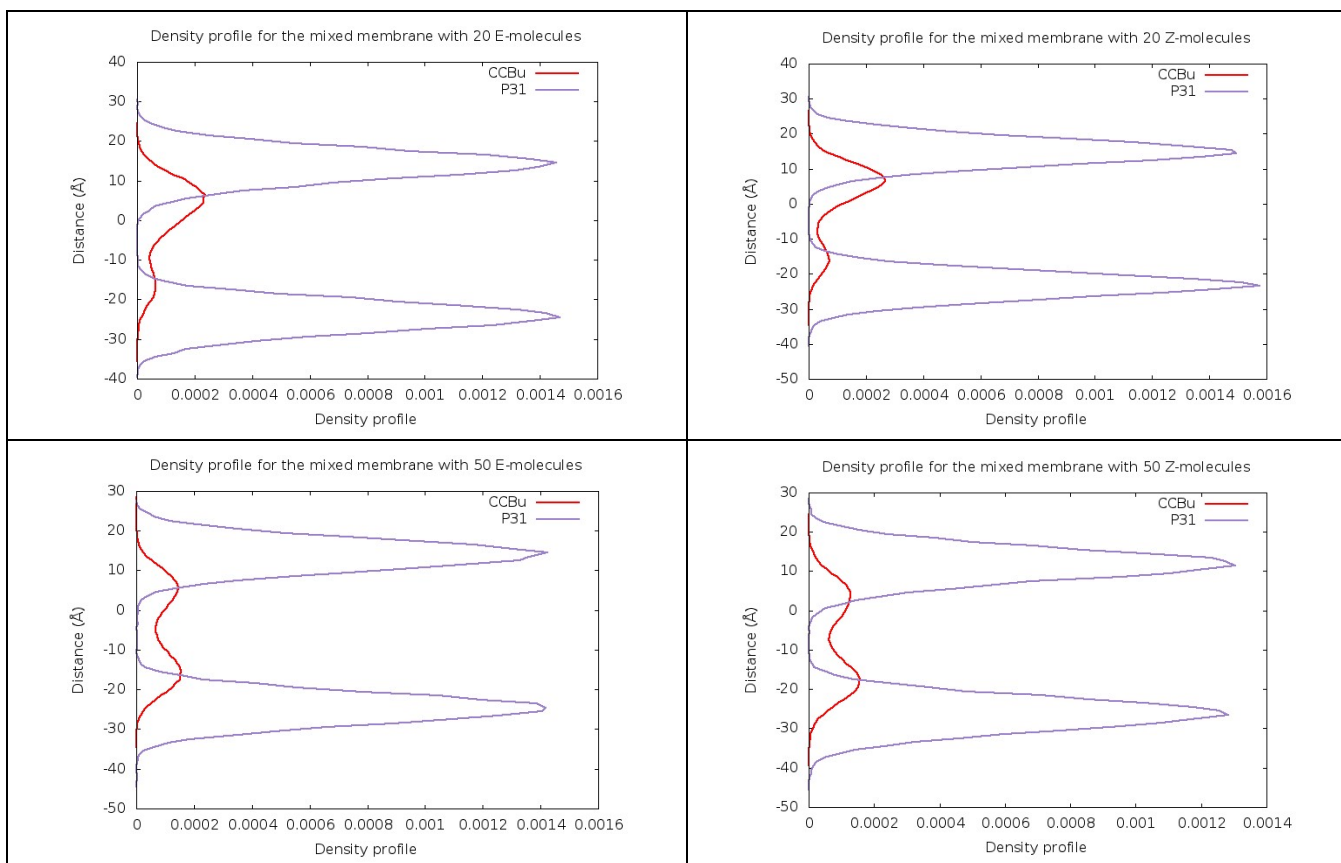

Figure S7. Normalized density profiles for CCBu in *E*- and *Z*-conformations for lipid bilayers containing 5, 10, 20, and 50 ligands where the red plot is a density for CCBu molecule and the purple plot is the density profile of phosphorus atom in the lipids polar heads.

## Force Field Parameters

### Coordinates and Point RESP charges

All compounds are described with Atom name; Atom type; X, Y, Z coordinates and RESP charges.

#### E-CCBu

|      |    |        |        |        |           |
|------|----|--------|--------|--------|-----------|
| C1B  | ca | -5.003 | -2.768 | -0.721 | -0.239554 |
| C2B  | ca | -6.354 | -2.686 | -0.405 | 0.272242  |
| C3B  | ca | -6.888 | -1.460 | 0.050  | 0.190995  |
| C4B  | ca | -6.075 | -0.345 | 0.180  | -0.225953 |
| C5B  | ca | -4.705 | -0.423 | -0.150 | -0.114296 |
| C6B  | ca | -4.184 | -1.646 | -0.593 | -0.174799 |
| C7B  | cc | -3.848 | 0.768  | -0.036 | 0.493676  |
| O1B  | os | -2.518 | 0.447  | 0.000  | -0.311238 |
| C8B  | cc | -1.562 | 1.429  | 0.099  | 0.483006  |
| C9B  | cd | -1.912 | 2.738  | 0.191  | -0.670893 |
| C10B | c  | -3.306 | 3.168  | 0.151  | 0.901030  |
| C11B | cd | -4.254 | 2.061  | 0.018  | -0.681997 |
| O2B  | o  | -3.655 | 4.350  | 0.219  | -0.645101 |
| C12B | ca | 2.282  | 0.996  | 0.022  | 0.048624  |
| O3B  | oh | -7.157 | -3.775 | -0.524 | -0.563218 |
| O4B  | os | -8.228 | -1.522 | 0.341  | -0.293945 |
| C13B | ca | 3.358  | 1.890  | -0.187 | -0.314286 |
| C14B | ca | 4.678  | 1.456  | -0.193 | 0.258286  |
| C15B | ca | 4.961  | 0.081  | 0.018  | 0.330382  |
| C16B | ca | 3.902  | -0.805 | 0.230  | -0.283542 |
| C17B | ca | 2.582  | -0.355 | 0.233  | -0.221286 |
| O5B  | os | 5.765  | 2.253  | -0.389 | -0.336663 |
| O6B  | os | 6.275  | -0.259 | -0.002 | -0.474312 |
| C18B | c3 | -8.875 | -0.342 | 0.798  | -0.125739 |
| C19B | c3 | 5.546  | 3.637  | -0.604 | 0.026521  |
| C20B | ce | -0.231 | 0.841  | 0.103  | -0.342579 |
| C21B | cf | 0.925  | 1.533  | 0.006  | -0.038913 |
| H1B  | ha | -4.606 | -3.716 | -1.069 | 0.194953  |
| H2B  | ha | -6.484 | 0.584  | 0.557  | 0.166619  |
| H3B  | ha | -3.133 | -1.718 | -0.848 | 0.164719  |
| H4B  | ha | -1.150 | 3.502  | 0.300  | 0.226795  |
| H5B  | ha | -5.305 | 2.312  | -0.051 | 0.227206  |
| H6B  | ho | -8.051 | -3.500 | -0.255 | 0.409175  |
| H7B  | ha | 3.136  | 2.939  | -0.349 | 0.173244  |
| H8B  | ha | 4.103  | -1.856 | 0.398  | 0.149378  |
| H9B  | ha | 1.787  | -1.073 | 0.410  | 0.197761  |
| H10B | h1 | -9.921 | -0.611 | 0.951  | 0.107490  |
| H11B | h1 | -8.444 | 0.004  | 1.746  | 0.107490  |
| H12B | h1 | -8.808 | 0.460  | 0.053  | 0.107490  |
| H13B | h1 | 6.535  | 4.078  | -0.735 | 0.063969  |
| H14B | h1 | 4.946  | 3.816  | -1.507 | 0.063969  |
| H15B | h1 | 5.050  | 4.107  | 0.256  | 0.063969  |
| H16B | ha | -0.224 | -0.243 | 0.178  | 0.158621  |
| H17B | ha | 0.866  | 2.615  | -0.108 | 0.141473  |
| C22B | c3 | 6.635  | -1.625 | 0.201  | 0.306458  |
| H18B | h1 | 6.271  | -1.965 | 1.182  | 0.001941  |

|      |    |        |        |        |           |
|------|----|--------|--------|--------|-----------|
| H19B | h1 | 6.164  | -2.253 | -0.569 | 0.001941  |
| C23B | c3 | 8.152  | -1.720 | 0.124  | -0.112489 |
| H20B | hc | 8.478  | -1.339 | -0.852 | 0.055166  |
| H21B | hc | 8.584  | -1.053 | 0.881  | 0.055166  |
| C24B | c3 | 8.663  | -3.152 | 0.329  | 0.096147  |
| H22B | hc | 8.215  | -3.813 | -0.427 | -0.015522 |
| H23B | hc | 8.321  | -3.527 | 1.304  | -0.015522 |
| C25B | c3 | 10.190 | -3.253 | 0.252  | -0.175700 |
| H24B | hc | 10.528 | -4.284 | 0.401  | 0.043882  |
| H25B | hc | 10.559 | -2.917 | -0.725 | 0.043882  |
| H26B | hc | 10.666 | -2.630 | 1.018  | 0.043882  |

### **Z-CCBu**

|      |    |        |        |        |           |
|------|----|--------|--------|--------|-----------|
| C1B  | ca | 6.364  | -1.486 | -0.947 | -0.261883 |
| C2B  | ca | 7.240  | -0.407 | -0.923 | 0.286293  |
| C3B  | ca | 6.798  | 0.835  | -0.416 | 0.185719  |
| C4B  | ca | 5.504  | 0.980  | 0.057  | -0.249740 |
| C5B  | ca | 4.615  | -0.117 | 0.044  | -0.067866 |
| C6B  | ca | 5.061  | -1.342 | -0.469 | -0.169670 |
| C7B  | cc | 3.248  | 0.031  | 0.568  | 0.452886  |
| O1B  | os | 2.427  | -0.988 | 0.169  | -0.355544 |
| C8B  | cc | 1.110  | -1.028 | 0.563  | 0.614150  |
| C9B  | cd | 0.592  | -0.063 | 1.363  | -0.671133 |
| C10B | c  | 1.396  | 1.069  | 1.824  | 0.864095  |
| C11B | cd | 2.783  | 1.026  | 1.366  | 0.660296  |
| O2B  | o  | 0.949  | 1.966  | 2.544  | -0.633829 |
| C12B | ca | -2.044 | -1.791 | -0.178 | 0.020970  |
| O3B  | oh | 8.509  | -0.540 | -1.389 | -0.562622 |
| O4B  | os | 7.757  | 1.817  | -0.466 | -0.287542 |
| C13B | ca | -3.259 | -2.484 | 0.036  | -0.308653 |
| C14B | ca | -4.485 | -1.832 | 0.009  | 0.266331  |
| C15B | ca | -4.530 | -0.440 | -0.265 | 0.313400  |
| C16B | ca | -3.336 | 0.241  | -0.507 | -0.270120 |
| C17B | ca | -2.109 | -0.423 | -0.462 | -0.216038 |
| O5B  | os | -5.694 | -2.425 | 0.221  | -0.336797 |
| O6B  | os | -5.767 | 0.118  | -0.277 | -0.464959 |
| C18B | c3 | 7.426  | 3.108  | 0.027  | -0.133058 |
| C19B | c3 | -5.713 | -3.814 | 0.502  | 0.013403  |
| C20B | ce | 0.488  | -2.258 | 0.075  | -0.486439 |
| C21B | cf | -0.804 | -2.577 | -0.166 | 0.018797  |
| H1B  | ha | 6.716  | -2.434 | -1.340 | 0.200816  |
| H2B  | ha | 5.165  | 1.943  | 0.418  | 0.171521  |
| H3B  | ha | 4.388  | -2.190 | -0.488 | 0.166696  |
| H4B  | ha | -0.440 | -0.123 | 1.684  | 0.251707  |
| H5B  | ha | 3.444  | 1.813  | 1.710  | 0.225551  |
| H6B  | ho | 8.943  | 0.325  | -1.282 | 0.406071  |
| H7B  | ha | -3.220 | -3.549 | 0.236  | 0.171459  |
| H8B  | ha | -3.352 | 1.301  | -0.734 | 0.153447  |
| H9B  | ha | -1.203 | 0.134  | -0.669 | 0.191766  |
| H10B | h1 | 8.324  | 3.716  | -0.094 | 0.109454  |

|      |    |        |        |        |           |
|------|----|--------|--------|--------|-----------|
| H11B | h1 | 6.603  | 3.552  | -0.547 | 0.109454  |
| H12B | h1 | 7.150  | 3.068  | 1.088  | 0.109454  |
| H13B | h1 | -6.764 | -4.074 | 0.644  | 0.066103  |
| H14B | h1 | -5.304 | -4.401 | -0.331 | 0.066103  |
| H15B | h1 | -5.154 | -4.050 | 1.417  | 0.066103  |
| H16B | ha | 1.218  | -3.049 | -0.089 | 0.193890  |
| H17B | ha | -0.963 | -3.626 | -0.414 | 0.117896  |
| C22B | c3 | -5.886 | 1.517  | -0.538 | 0.291978  |
| H18B | h1 | -5.311 | 2.086  | 0.208  | 0.003779  |
| H19B | h1 | -5.472 | 1.748  | -1.530 | 0.003779  |
| C23B | c3 | -7.364 | 1.875  | -0.471 | -0.097664 |
| H20B | hc | -7.907 | 1.261  | -1.201 | 0.050846  |
| H21B | hc | -7.748 | 1.598  | 0.519  | 0.050846  |
| C24B | c3 | -7.621 | 3.364  | -0.739 | 0.094451  |
| H22B | hc | -7.223 | 3.633  | -1.727 | -0.014173 |
| H23B | hc | -7.063 | 3.969  | -0.010 | -0.014173 |
| C25B | c3 | -9.107 | 3.729  | -0.672 | -0.181897 |
| H24B | hc | -9.263 | 4.796  | -0.866 | 0.044961  |
| H25B | hc | -9.687 | 3.166  | -1.413 | 0.044961  |
| H26B | hc | -9.526 | 3.505  | 0.316  | 0.044961  |
